# Supplementary material for: Development of phenyllactic acid ionic liquids and evaluation of cytotoxicity to human cervical epithelial cells
Source: Royal Society of Chemistry journal article supplement (doi:10.1039/d4ra01812e), 2024-01-01
Supplement: d4ra01812e1.pdf [file d4ra01812e1.pdf]

**Development of Phenyllactic Acid Ionic Liquids and Evaluation of Cytotoxicity to Human Cervical Epithelial Cells**

Phoebe Crossley<sup>1,4#</sup>, Yogesh Sutar<sup>2#</sup>, Irina Tsoy<sup>2</sup>, Srushti Mukkirwar<sup>2</sup>, Paweł Łaniewski<sup>3</sup>,  
Melissa M. Herbst-Kralovetz<sup>3,4,5\*</sup>, and Abhijit A. Date<sup>2,5,6\*</sup>

<sup>1</sup>Department of Life Sciences, University of Bath, Bath, UK

<sup>2</sup>Department of Pharmacology and Toxicology, R. Ken Coit College of Pharmacy, University of Arizona, Tucson, AZ, USA; E-mail: abhijitdate@arizona.edu

<sup>3</sup>Department of Basic Medical Sciences, College of Medicine – Phoenix, University of Arizona, Phoenix, AZ, USA; E-mail: mherbst1@arizona.edu

<sup>4</sup>Department of Obstetrics and Gynecology, College of Medicine – Phoenix, University of Arizona, Phoenix, AZ, USA

<sup>5</sup>University of Arizona Cancer Center, University of Arizona, Tucson, AZ, USA

<sup>6</sup>Department of Ophthalmology and Visual Sciences, University of Arizona College of Medicine, Tucson, AZ, USA

# Authors contributed equally.

\* Corresponding authors

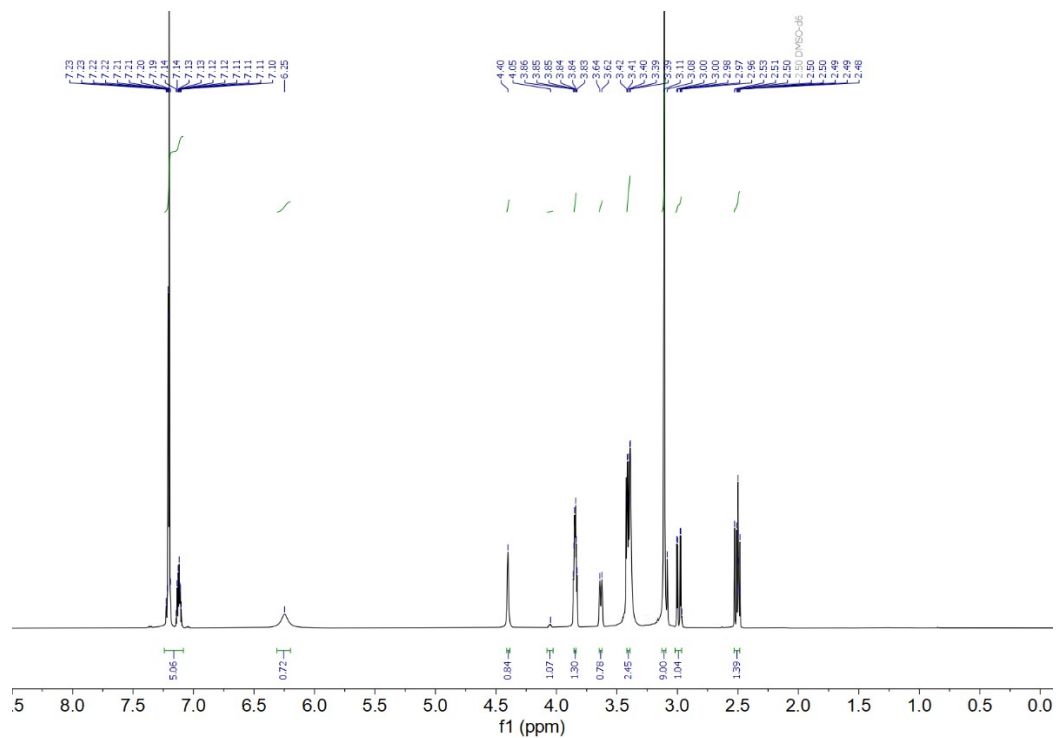

**Fig. S1:**  $^1\text{H}$  NMR spectrum of Chol:D-PLA (1:1)

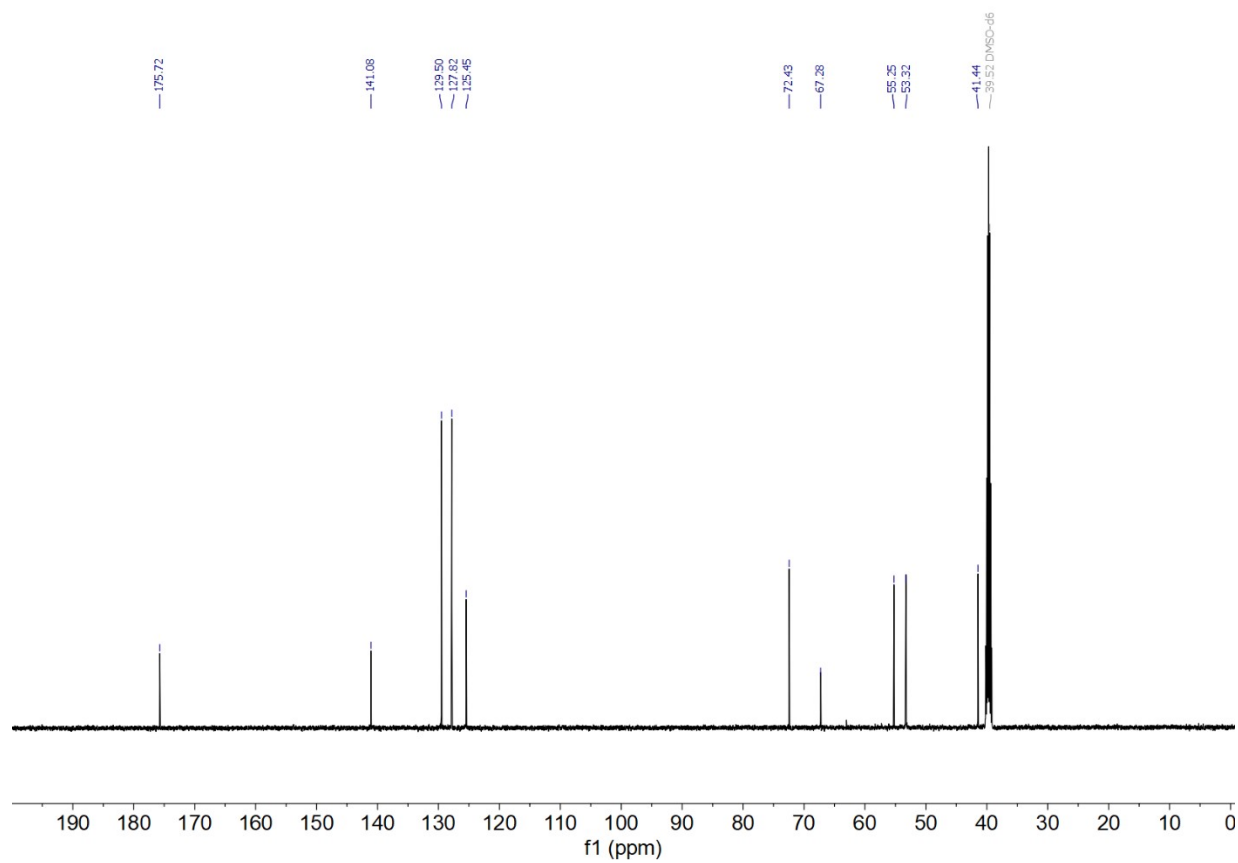

**Fig. S2:**  $^{13}\text{C}$  NMR spectrum of Chol:D-PLA (1:1)

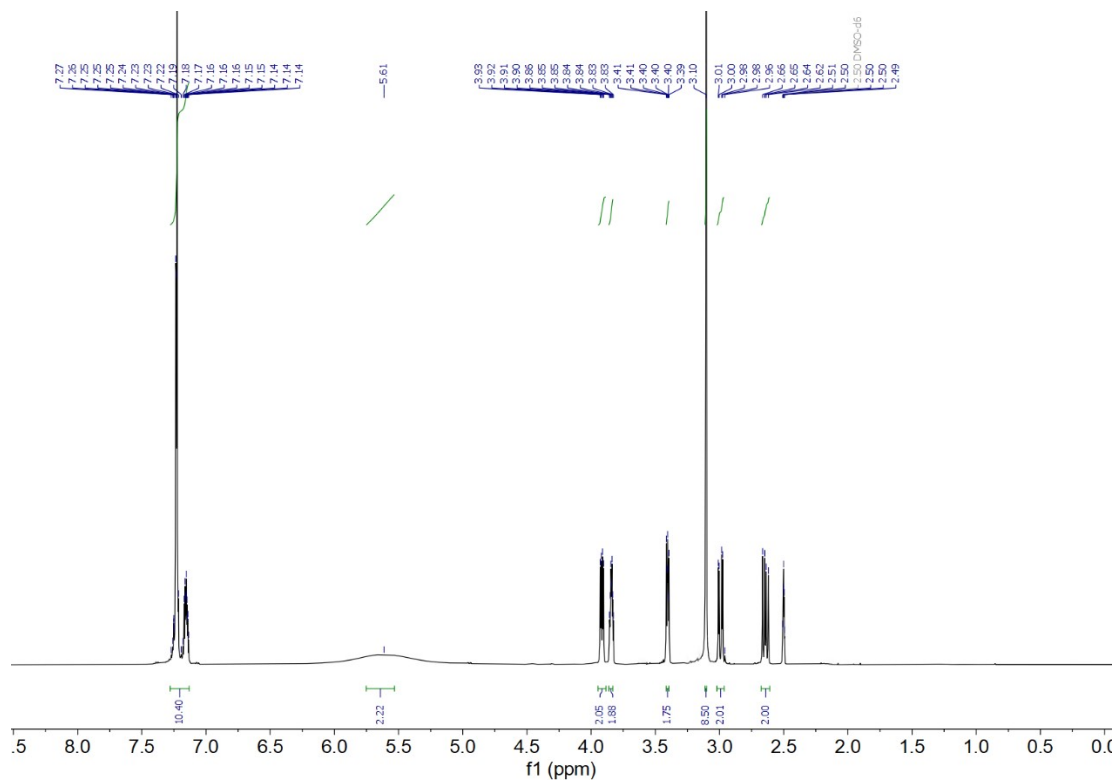**Fig. S3:** <sup>1</sup>H NMR spectrum of Chol:D-PLA (1:2)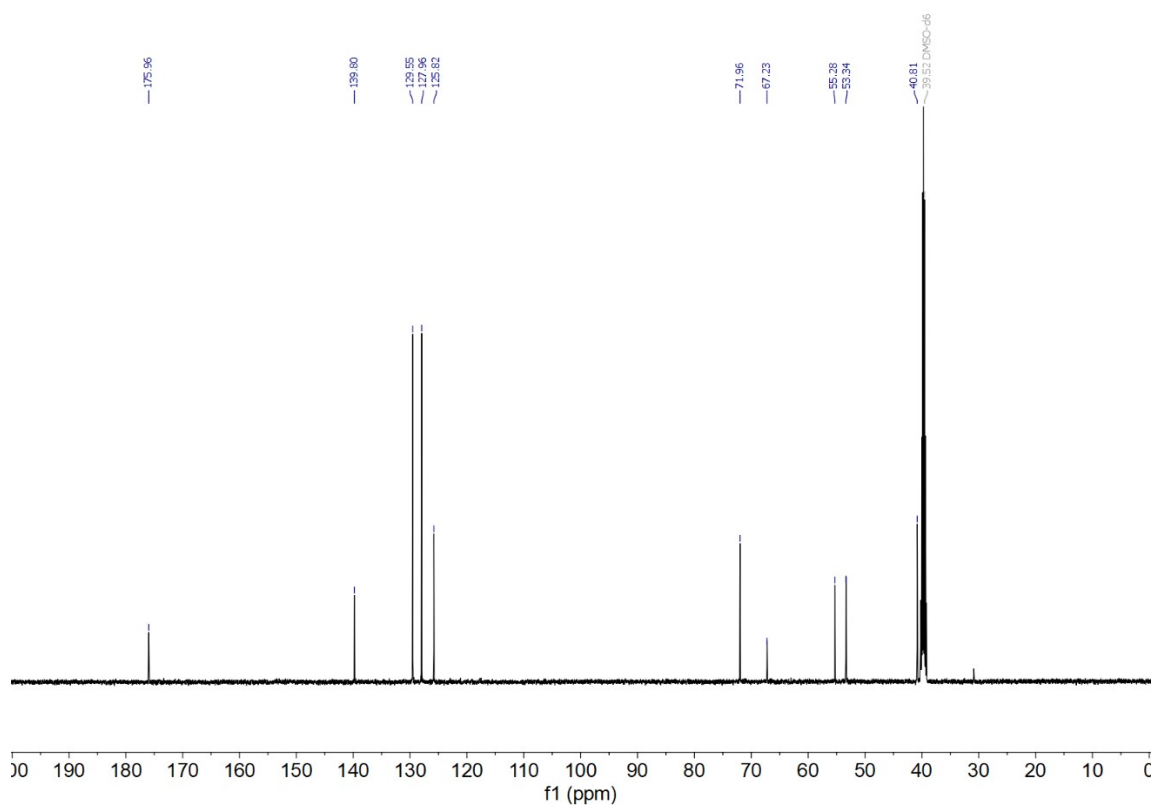**Fig. S4:** <sup>13</sup>C NMR spectrum of Chol:D-PLA (1:2)

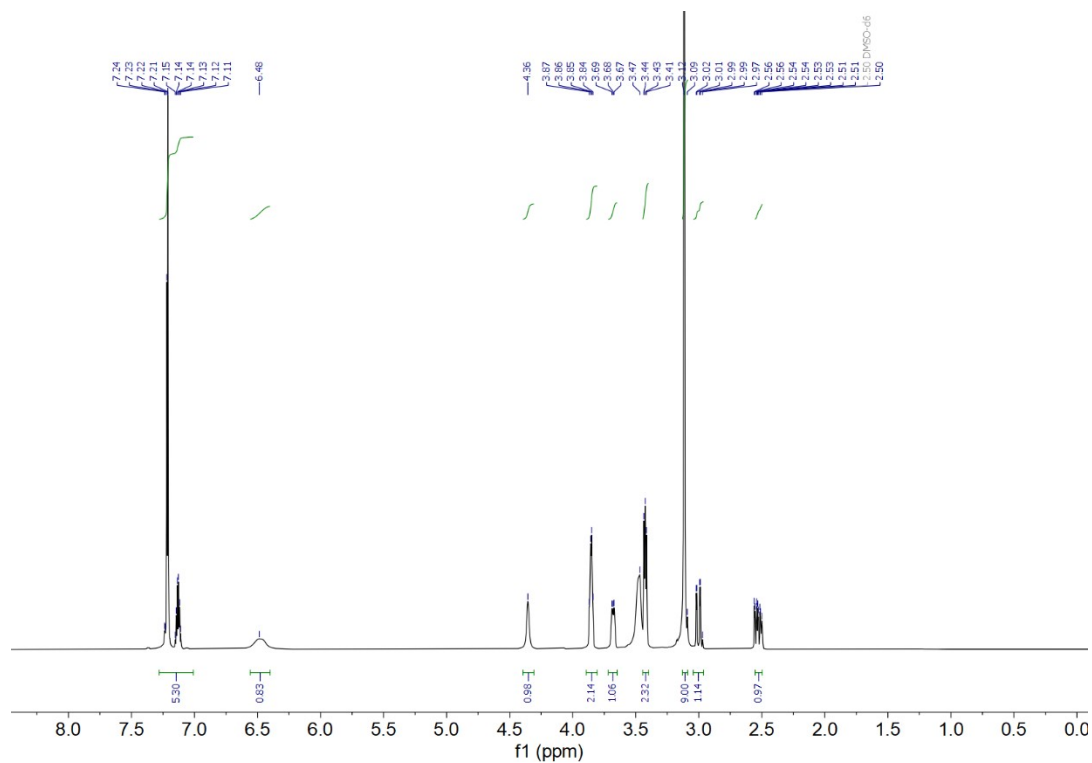

**Fig. S5:** <sup>1</sup>H NMR spectrum of Chol:L-PLA (1:1)

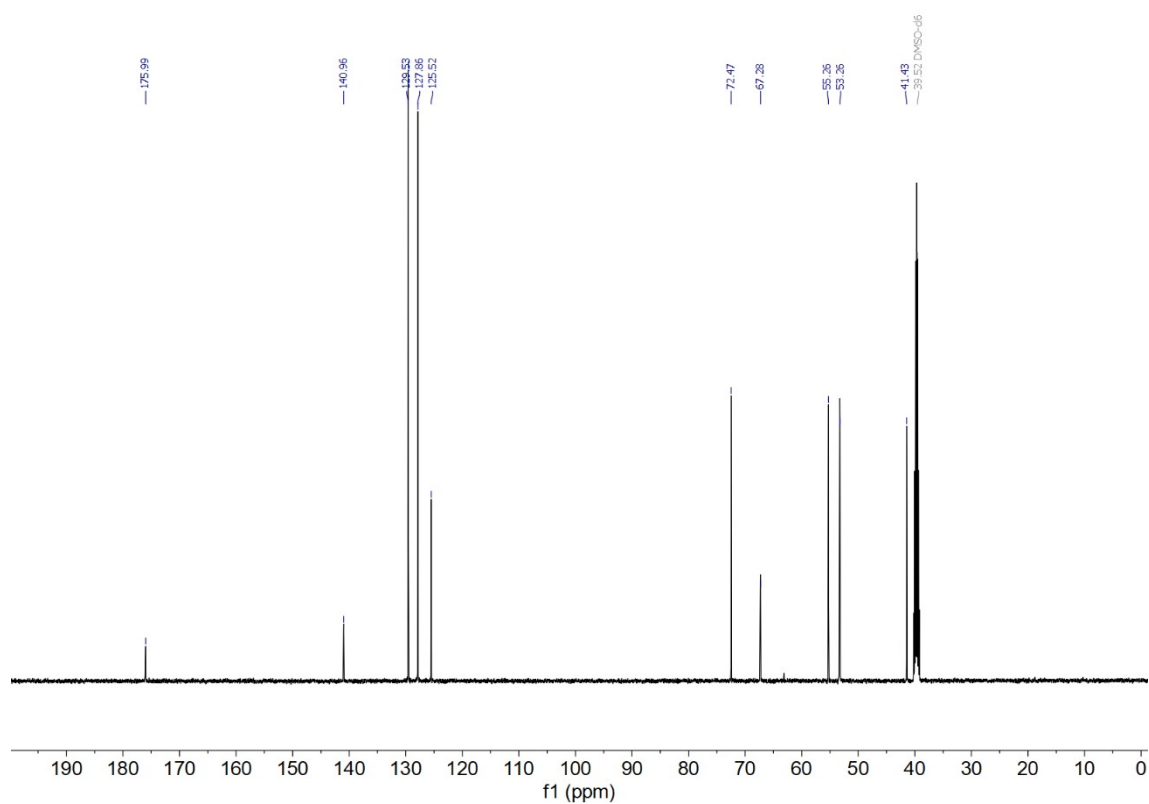

**Fig. S6:** <sup>13</sup>C NMR spectrum of Chol:L-PLA (1:1)

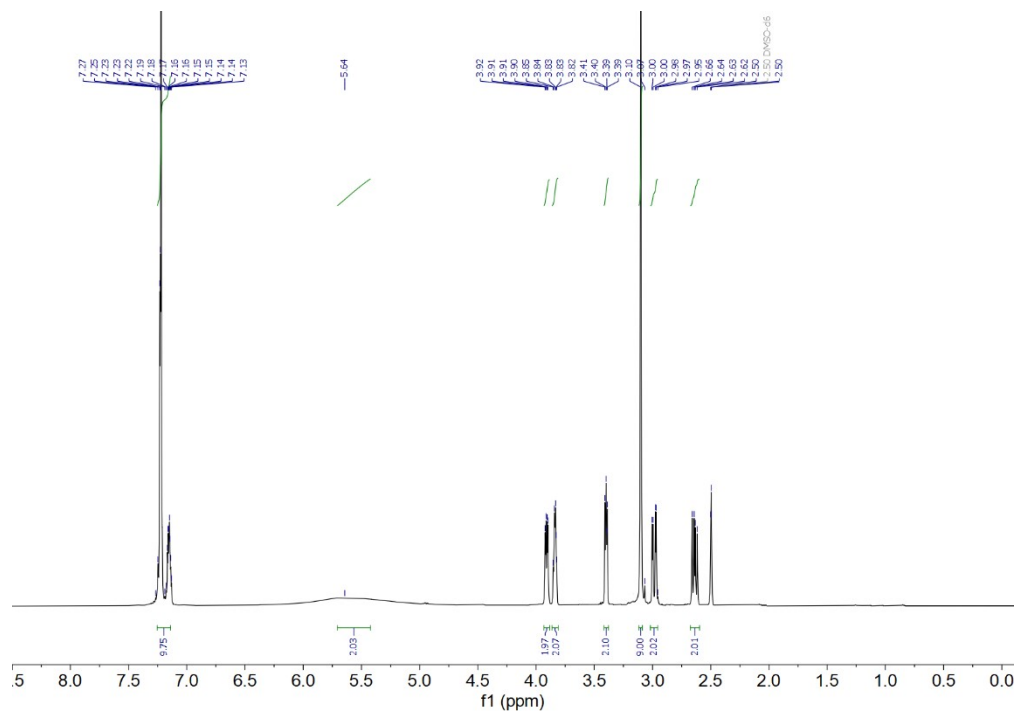

Fig. S7: <sup>1</sup>H NMR spectrum of Chol:L-PLA (1:2)

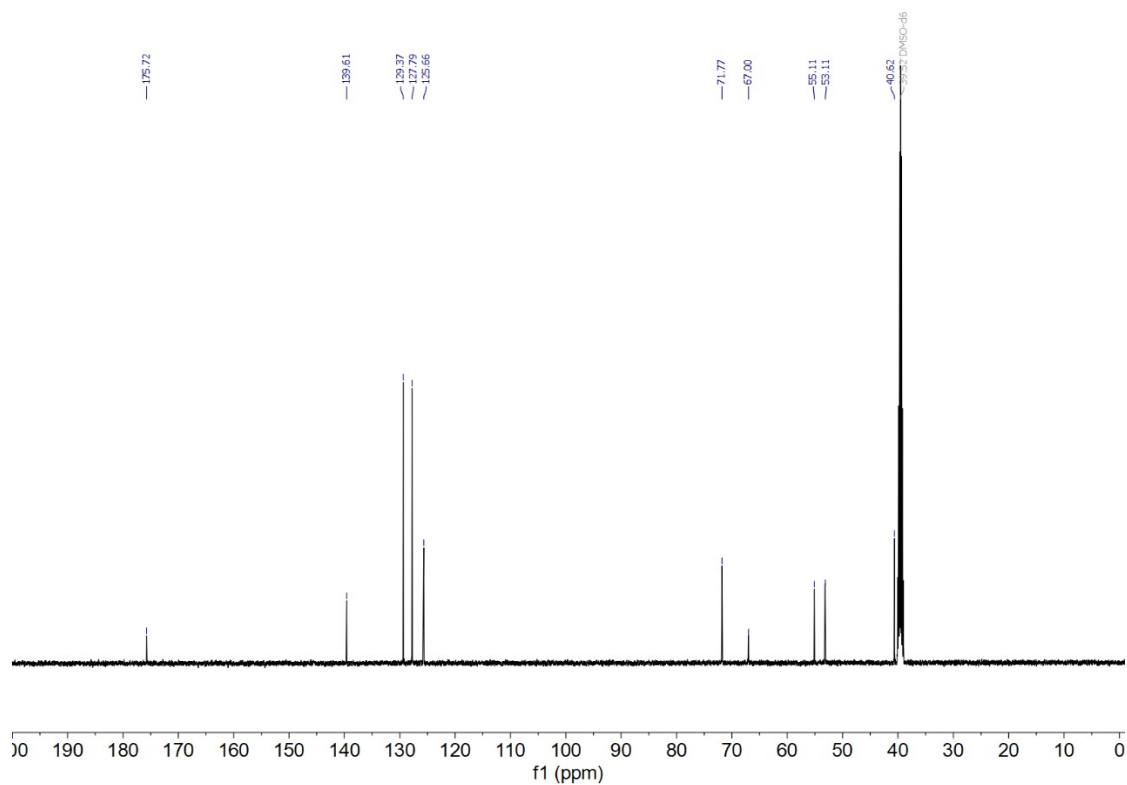

Fig. S8: <sup>13</sup>C NMR spectrum of Chol:L-PLA (1:2)

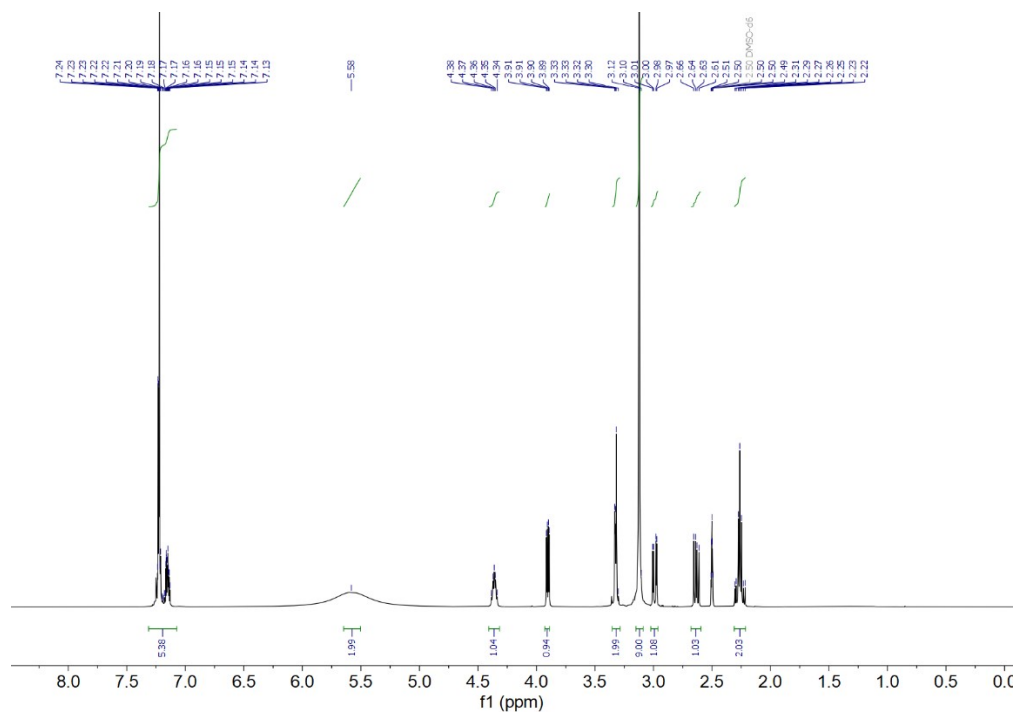**Fig. S9:** <sup>1</sup>H NMR spectrum of Car:D-PLA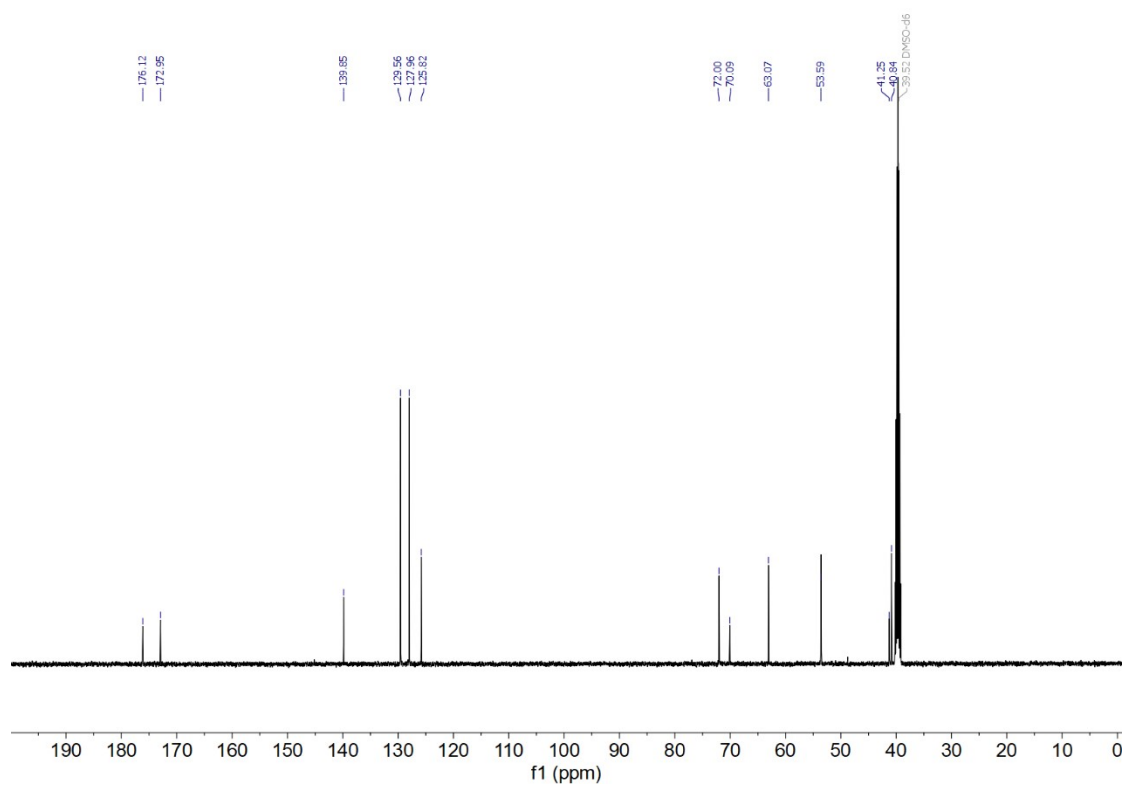**Fig. S10:** <sup>13</sup>C NMR spectrum of Car:D-PLA

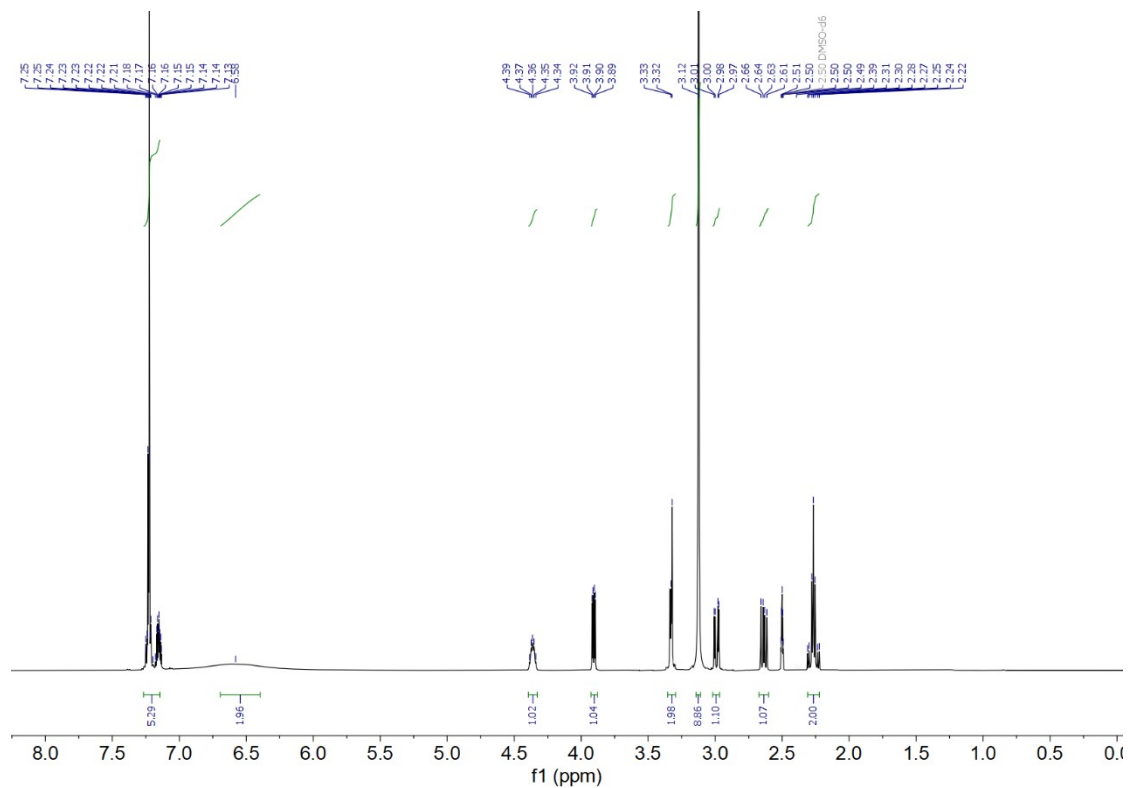

Fig. S11: <sup>1</sup>H NMR spectrum of Car:L-PLA

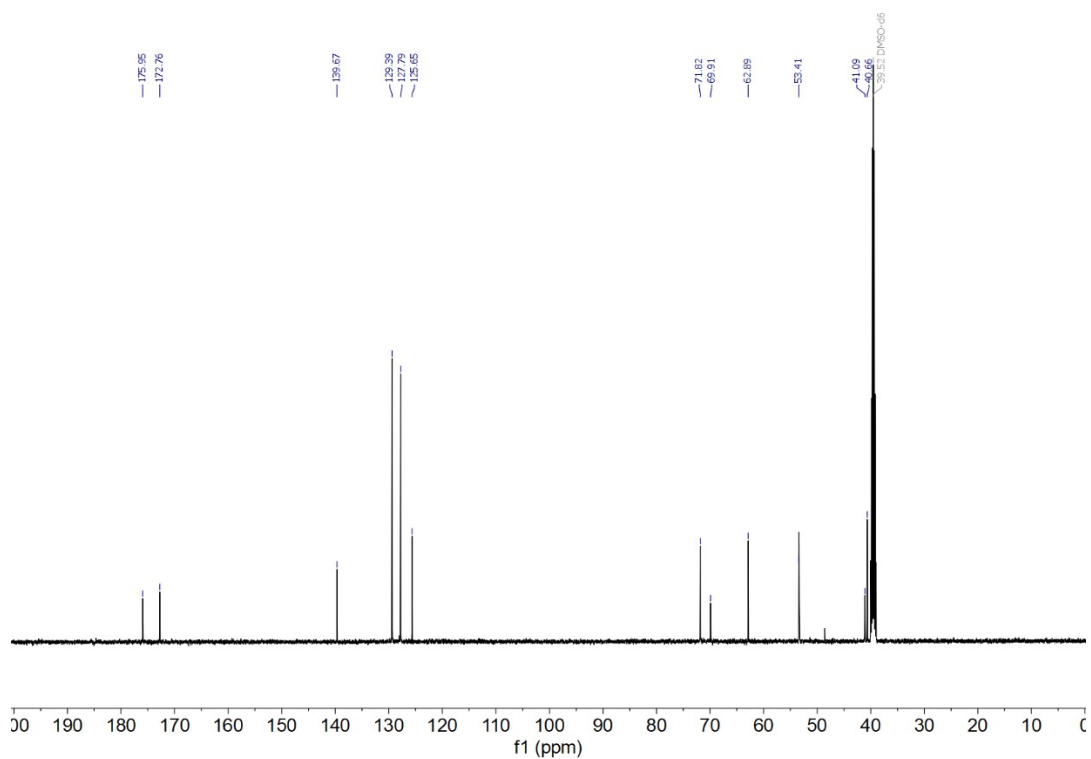

Fig. S12: <sup>13</sup>C NMR spectrum of Car:L-PLA

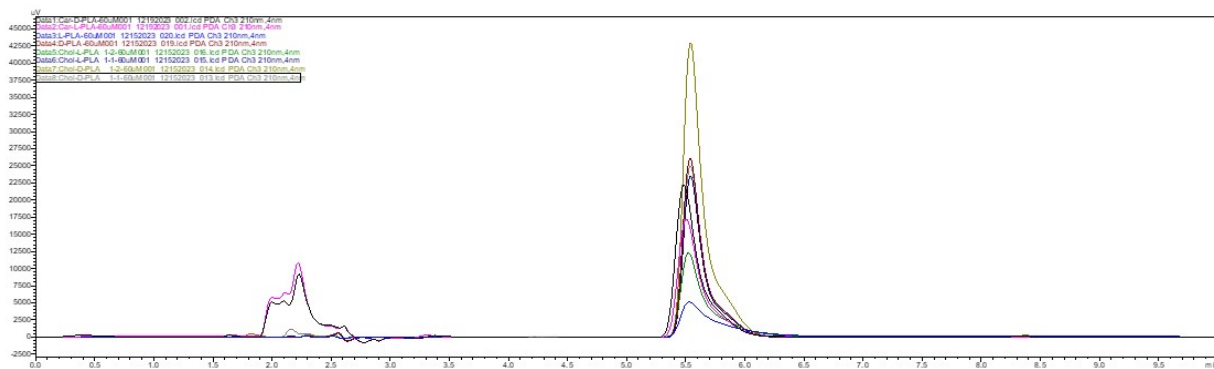

**Figure S13:** The overlay HPLC chromatogram of D-PLA, L-PLA, Chol:D-PLA (1:1), Chol:L-PLA (1:1), Chol:D-PLA (1:2), Chol:L-PLA (1:2), Car:D-PLA and Car:L-PLA. (concentration: 60  $\mu$ M).



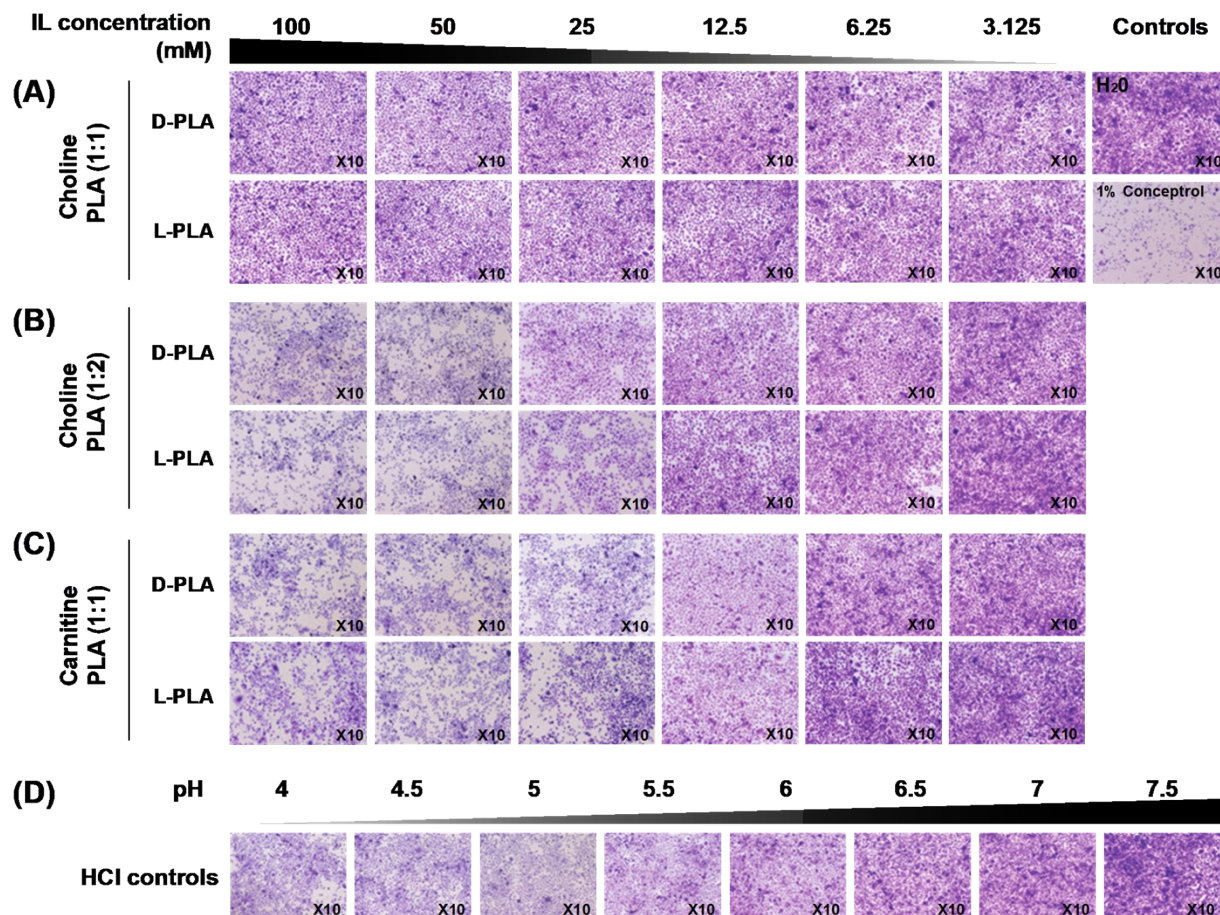

**Figure S14.** PLA ILs causes no morphological changes to human cervical epithelial cells at low concentrations ( $\leq 12.5$  mM). Microscopy images, at X10 magnification, of crystal violet stained cervical epithelial (A2EN) cells, grown as monolayers, following 24- hr treatment with varying concentrations of **(A)** Chol:D-PLA (1:1) and Chol:L-PLA (1:1), **(B)** Chol:D-PLA (1:2) and Chol:L-PLA (1:2), and **(C)** Car:D-PLA (1:1) and Car:L-PLA, and **(D)** HCl control solutions. Deionised water and 1% Conceptrol were used as negative and positive controls respectively.

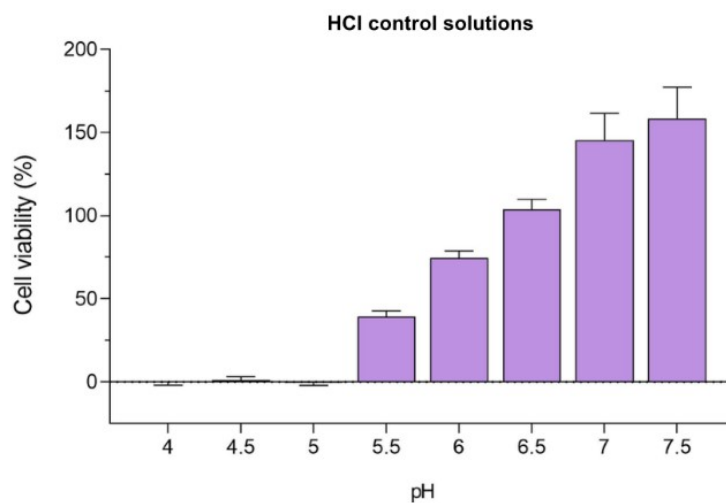

**Figure S15. Low pH of HCl control solutions are cytotoxic to human epithelial cells.** Percentage cell viability was determined by MTT assay following 24-hr treatment of cervical epithelial (A2EN) cell monolayers with HCl control solutions ranging from 4-7.5 pH. Absorbance was measured at 570 nm (650 nm reference). Percentage cell viability was calculated relative to untreated control (100%) and plotted as mean  $\pm$  SEM, using 6 independent experiments per pH solution.
